# Supplementary material for: Superinfection and the evolution of an initial asymptomatic stage
Source: PubMed Central journal article supplement (PMC7890506; doi:10.1098/rsos.202212), 2021-01-27
Supplement: rsos202212_review_history.pdf [file rsos202212_review_history.pdf]

## **Superinfection and the evolution of an initial asymptomatic stage**

Chadi M. Saad-Roy, Bryan T. Grenfell, Simon A. Levin, Lorenzo Pellis, Helena B. Stage, P. van den Driessche and Ned S. Wingreen

### **Article citation details**

*R. Soc. open sci.* **8**: 202212.  
<http://dx.doi.org/10.1098/rsos.202212>

### **Review timeline**

Original submission: 4 December 2020  
Final acceptance: 16 December 2020

Note: Reports are unedited and appear as submitted by the referee. The review history appears in chronological order.

Note: This manuscript was transferred from another Royal Society journal with peer review.

## **Review History**

### **Decision letter (RSOS-202212.R0)**

This year has been very difficult for everyone, and we want to take the opportunity to thank you for your continued support in 2020.

The Royal Society Open Science editorial office will be closed from the evening of Friday 18 December 2020 until Monday 4 January 2021. We will not be responding during this time. If you have received a deadline within this time period, please contact us as soon as possible to allow us to extend the deadline. If you receive any automated messages during this time asking you to meet a deadline, we offer apologies and invite you to respond after the festive period or during normal working hours.

With our best for a peaceful festive period and New Year, and we look forward to working with you in 2021.

Dear Mr Saad-Roy:

It is a pleasure to accept your manuscript entitled "Superinfection and the evolution of an initial asymptomatic stage" in its current form for publication in Royal Society Open Science.

Please ensure that you send to the editorial office an editable version of your accepted manuscript, and individual files for each figure and table included in your manuscript. You can send these in a zip folder if more convenient. Failure to provide these files may delay the processing of your proof.

You can expect to receive a proof of your article in the near future. Please contact the editorial office ([openscience@royalsociety.org](mailto:openscience@royalsociety.org)) and the production office ([openscience\\_proofs@royalsociety.org](mailto:openscience_proofs@royalsociety.org)) to let us know if you are likely to be away from e-mail contact -- if you are going to be away, please nominate a co-author (if available) to manage the proofing process, and ensure they are copied into your email to the journal.

Due to rapid publication and an extremely tight schedule, if comments are not received, your paper may experience a delay in publication.

Please see the Royal Society Publishing guidance on how you may share your accepted author manuscript at <https://royalsociety.org/journals/ethics-policies/media-embargo/>.

Thank you for your fine contribution. On behalf of the Editors of Royal Society Open Science, we look forward to your continued contributions to the Journal.

Kind regards,  
Andrew Dunn  
Royal Society Open Science Editorial Office  
Royal Society Open Science  
[openscience@royalsociety.org](mailto:openscience@royalsociety.org)

on behalf of Professor Tim Rogers (Associate Editor) and Professor Mark Chaplain (Subject Editor).

Follow Royal Society Publishing on Twitter: @RSocPublishing  
Follow Royal Society Publishing on Facebook:  
<https://www.facebook.com/RoyalSocietyPublishing.FanPage/>  
Read Royal Society Publishing's blog:  
<https://royalsociety.org/blog/blogsearchpage/?category=Publishing>
